# Supplementary figures and images for: Effect of Astaxanthin on Tissue Transglutaminase and Cytoskeletal Protein Expression in Amyloid-Beta Stressed Olfactory Ensheathing Cells: Molecular and Delayed Luminescence Studies
Source: MDPI journal article supplement (doi:10.3390/antiox12030750), 2023-03-19

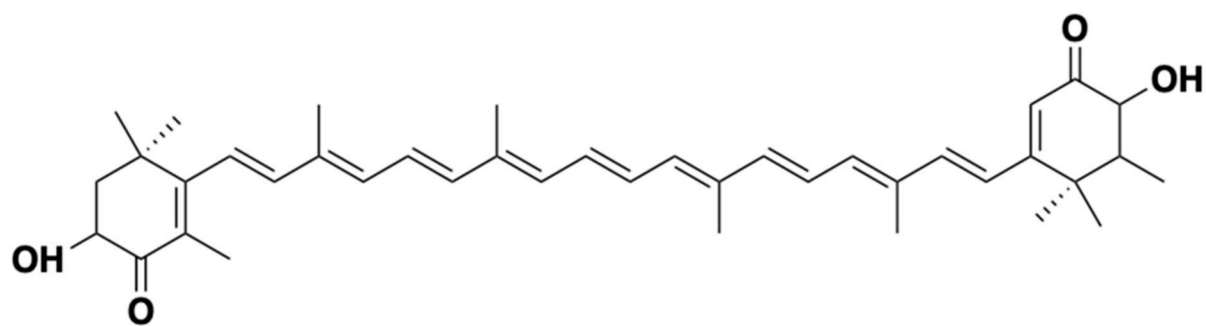

**Figure S1.** Astaxanthin structure.

Supplement: s1 [file s1]
